# Annals of Oncology

Official Journal of the  
European Society for Medical Oncology

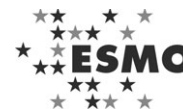

## Volume 18, 2007 Supplement 10

A multitargeted approach: clinical advances in the treatment of solid tumours

|                                                                                                                                                                  |     |                                                                                                                                |     |
|------------------------------------------------------------------------------------------------------------------------------------------------------------------|-----|--------------------------------------------------------------------------------------------------------------------------------|-----|
| Introduction to 'A multitargeted approach: clinical advances in the treatment of solid tumours'<br><i>D. George &amp; J. Verweij</i>                             | x1  | Advances in the treatment of gastrointestinal stromal tumours<br><i>I. Judson &amp; G. Demetri</i>                             | x20 |
| A preclinical review of sunitinib, a multitargeted receptor tyrosine kinase inhibitor with anti-angiogenic and antitumour activities<br><i>J. G. Christensen</i> | x3  | Treatment options in renal cell carcinoma: past, present and future<br><i>S. Oudard, D. George, J. Medioni &amp; R. Motzer</i> | x25 |
| Surrogate biomarkers in evaluating response to anti-angiogenic agents: focus on sunitinib<br><i>S. E. DePrimo &amp; C. Bello</i>                                 | x11 | Potential role of multi-targeted tyrosine kinase inhibitors in non-small-cell lung cancer<br><i>G. V. Scagliotti</i>           | x32 |
